# Supplementary material
Source: PubMed Central journal article supplement (PMC8559771)
Supplement: NIHMS1702235-supplement-2.pdf [file NIHMS1702235-supplement-2.pdf]

A

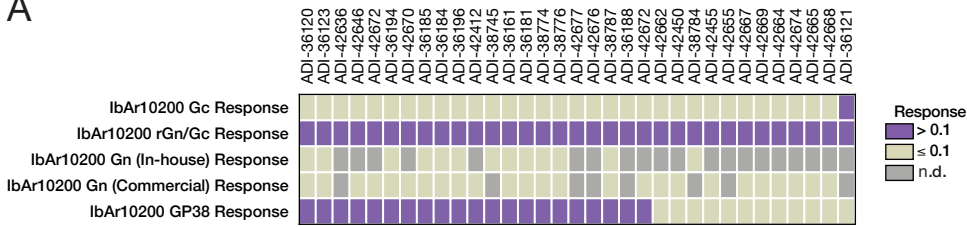

B

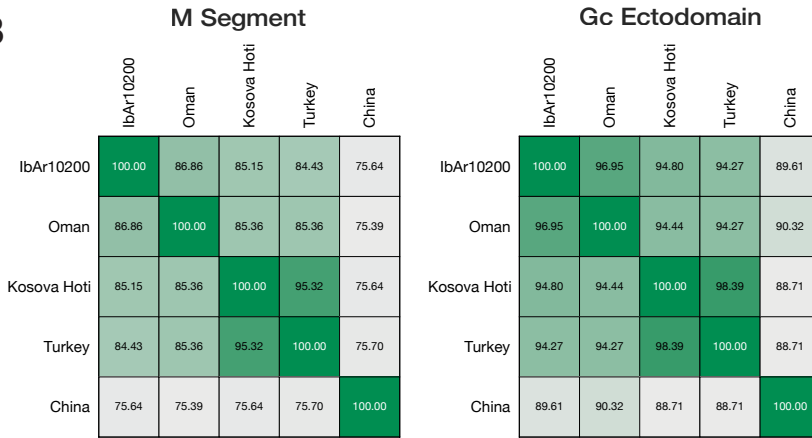

C

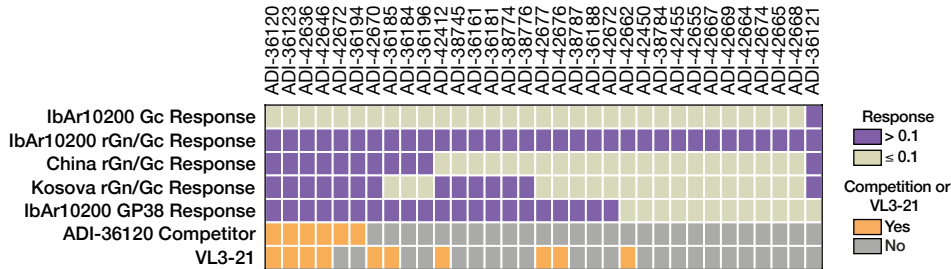

D

| Antibody  | ADI-36120 Competition | Donor | VH Germline | VH CDR1                     | VH CDR2                                      | VH CDR3                          |
|-----------|-----------------------|-------|-------------|-----------------------------|----------------------------------------------|----------------------------------|
| ADI-36120 | Yes                   | 1     | VH3-48      | FTFSS <b>F</b> EMN          | YIGD <b>S</b> GT <b>F</b> YADSV <b>Q</b> G   | ARDYGLDQ                         |
| ADI-36123 | Yes                   | 1     | VH3-66      | FTV <b>S</b> NNYMS          | AIY <b>S</b> D <b>G</b> TTYYADSVK <b>G</b>   | ARDNGDYVAGEGF <b>F</b> EY        |
| ADI-42636 | Yes                   | 7     | VH3-21      | FTFSSYS <b>M</b> N          | LIS <b>S</b> SSSYIYYADSVK <b>G</b>           | ARSPDIVVPPAAAYHDA <b>F</b> DI    |
| ADI-42645 | Yes                   | 7     | VH3-21      | FTFSSY <b>D</b> MN          | LIS <b>S</b> SSSYIYYAD <b>S</b> M <b>K</b> G | AR <b>S</b> ISAAGTDA <b>F</b> DI |
| ADI-42646 | Yes                   | 7     | VH3-21      | FT <b>F</b> NS <b>Y</b> SMN | SIG <b>S</b> SSSYIYYADSVK <b>G</b>           | ARDQVDD <b>F</b> DI              |

| Antibody  | ADI-36120 Competition | Donor | VL Germline | VL CDR1                      | VL CDR2                          | VL CDR3             |
|-----------|-----------------------|-------|-------------|------------------------------|----------------------------------|---------------------|
| ADI-36120 | Yes                   | 1     | VL3-21      | <b>A</b> GH <b>N</b> IGDKSVH | <b>H</b> DSER <b>P</b> P         | QVWDSDSYHY <b>V</b> |
| ADI-36123 | Yes                   | 1     | VL3-21      | GGNNIG <b>T</b> KSVH         | <b>D</b> DS <b>G</b> RP <b>S</b> | QVWDSSSDHY <b>V</b> |
| ADI-42636 | Yes                   | 7     | VL3-21      | GGNNIGSKSVH                  | <b>D</b> SDR <b>P</b> S          | QVWDSSSDHW <b>V</b> |
| ADI-42645 | Yes                   | 7     | VL3-21      | GGNNIGSKSVH                  | <b>D</b> SDR <b>P</b> S          | QVWDSSSDHW <b>V</b> |
| ADI-42646 | Yes                   | 7     | VL3-21      | GGNNIGSKSVH                  | <b>D</b> DS <b>G</b> RP <b>S</b> | QVWDSSSDHW <b>V</b> |
