# Supplementary material
Source: PubMed Central journal article supplement (PMC8559771)
Supplement: NIHMS1702235-supplement-3.pdf [file NIHMS1702235-supplement-3.pdf]

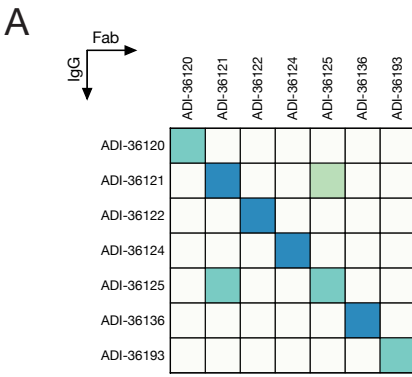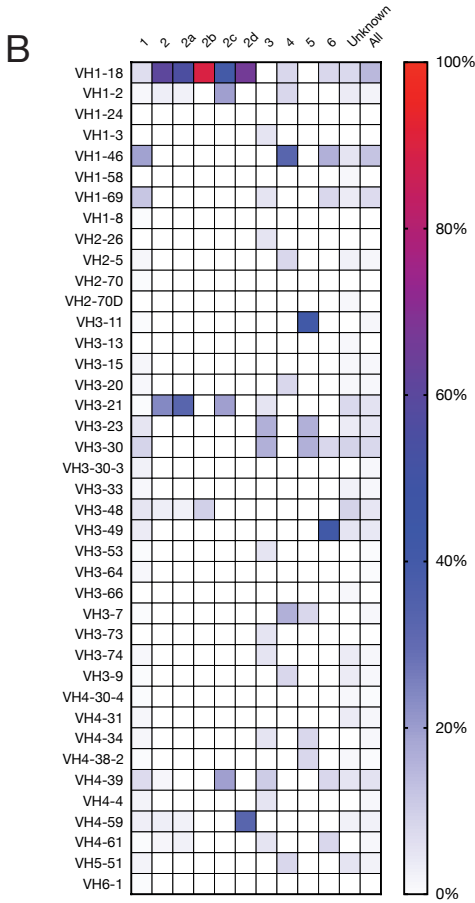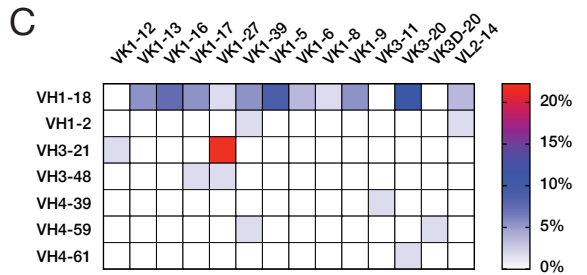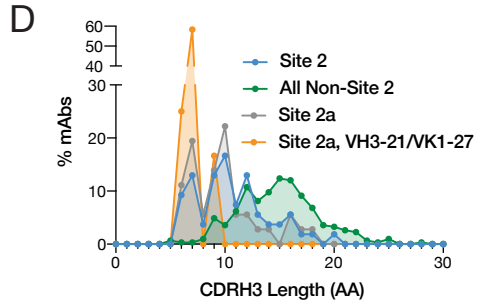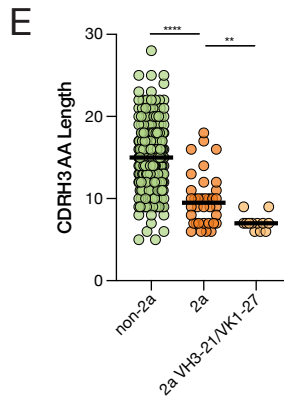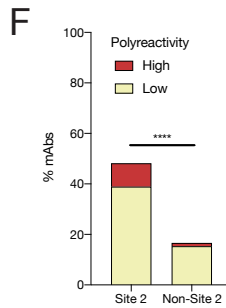

**G**

| Antibody  | Site | Donor | VH Germline | VH CDR1   | VH CDR2           | VH CDR3   | CDRH3 Length |
|-----------|------|-------|-------------|-----------|-------------------|-----------|--------------|
| ADI-36125 | 2a   | 1     | VH3-21      | FSLSYSMN  | SISNTGSYKYADSVKG  | ARDHVH    | 6            |
| ADI-36127 | 2a   | 1     | VH3-21      | FTFSSYSMN | SISSTGNMYYYADSLKG | ARGSGLH   | 7            |
| ADI-36137 | 2a   | 1     | VH3-21      | FTFSSYGMN | FISSTGNKYKYADSVKG | ARDYRI    | 6            |
| ADI-42418 | 2a   | 5     | VH3-21      | FTFSSYGMN | FISSTGSYIYYADSVKG | ARGGFVY   | 7            |
| ADI-42438 | 2a   | 5     | VH3-21      | FTFSSYSMN | VISSSGNYKYADSVKG  | ARPTGAVTS | 9            |
| ADI-42453 | 2a   | 5     | VH3-21      | FTFTSYSMH | SISSTGNMYYYADSLKG | TRGGFIY   | 7            |
| ADI-42467 | 2a   | 5     | VH3-21      | FTFSGYTM  | SISSSGNYMYADSVRG  | ARPVPGP   | 7            |
| ADI-42471 | 2a   | 5     | VH3-21      | FTFSSYTMN | SI-SSGSYTYADSVRG  | VRDQTQP   | 7            |
| ADI-37788 | 2a   | 6     | VH3-21      | FTFSSYTMN | SISSTGNMYYYADSMED | VKGGFDP   | 7            |
| ADI-37792 | 2a   | 6     | VH3-21      | FTFSGYTIM | SISSSGSYMYADSVQGG | ARDIKY    | 6            |
| ADI-42632 | 2a   | 7     | VH3-21      | FTFSSYSMI | SI-SSNSYIYYADSLKG | ARGGWVY   | 7            |
| ADI-42649 | 2a   | 7     | VH3-21      | FTFSSYTMN | SISSTGSYMYADSVKG  | APGSYFRDY | 9            |

| Antibody  | Site | Donor | VL Germline | VL CDR1     | VL CDR2 | VL CDR3   |
|-----------|------|-------|-------------|-------------|---------|-----------|
| ADI-36125 | 2a   | 1     | VK1-27      | RASQGISNFLA | TTSTLQS | LYNSAPWT  |
| ADI-36127 | 2a   | 1     | VK1-27      | RASQDISNYLA | AASTLQS | LKYNSAPWT |
| ADI-36137 | 2a   | 1     | VK1-27      | RASQGISNYLA | AASTLQS | QKYDIPVWT |
| ADI-42418 | 2a   | 5     | VK1-27      | RASQVISNFLA | AASTLQS | QKYNTAPYT |
| ADI-42438 | 2a   | 5     | VK1-27      | RASQHISNYLA | AASTLQS | QKYNSAPLT |
| ADI-42453 | 2a   | 5     | VK1-27      | RASQGISNYLA | AASTLQS | QKYNTAPWT |
| ADI-42467 | 2a   | 5     | VK1-27      | RASQHITNYLA | AASTLQS | QKYNTAPYT |
| ADI-42471 | 2a   | 5     | VK1-27      | RASQDISNYLA | AASTLQS | QKYRTAPWT |
| ADI-37788 | 2a   | 6     | VK1-27      | RASQDISNYLA | AASTLQS | QKYNRAPQT |
| ADI-37792 | 2a   | 6     | VK1-27      | RASQGISNYLA | GASELQS | QKYNRAPLT |
| ADI-42632 | 2a   | 7     | VK1-27      | RASQGISNYLA | AASTLQS | QKYNSAPQT |
| ADI-42649 | 2a   | 7     | VK1-27      | RASQGISNYLA | AASTLQS | QKYNSAPST |
