# Supplementary material
Source: PubMed Central journal article supplement (PMC8559771)
Supplement: NIHMS1702235-supplement-8.pdf [file NIHMS1702235-supplement-8.pdf]

| Donor ID | Sex | Birth Year | Date of Infection | Date of Blood Draw | Time Post-Infection (months) | Diagnostic Method | Hospitalization Time (days) | District |
|----------|-----|------------|-------------------|--------------------|------------------------------|-------------------|-----------------------------|----------|
| 1        | M   | 1949       | August 2013       | June 2017          | 46                           | PCR               | 14                          | Agago    |
| 5        | M   | 1982       | November 2015     | November 2017      | 24                           | PCR               | 14                          | Nakaseke |
| 6        | M   | 1987       | August 2017       | November 2017      | 3                            | PCR               | >28                         | Nakaseke |
| 7        | M   | 2008       | December 2017     | February 2018      | 2                            | PCR               | 14                          | N/A      |

**Table S1. Patient metadata of CCHF convalescent donors, related to Figure 1.**  
Time of blood draw post-infection, as well as time of hospitalization, are approximate.
