# Supplementary material
Source: PubMed Central journal article supplement (PMC8559771)

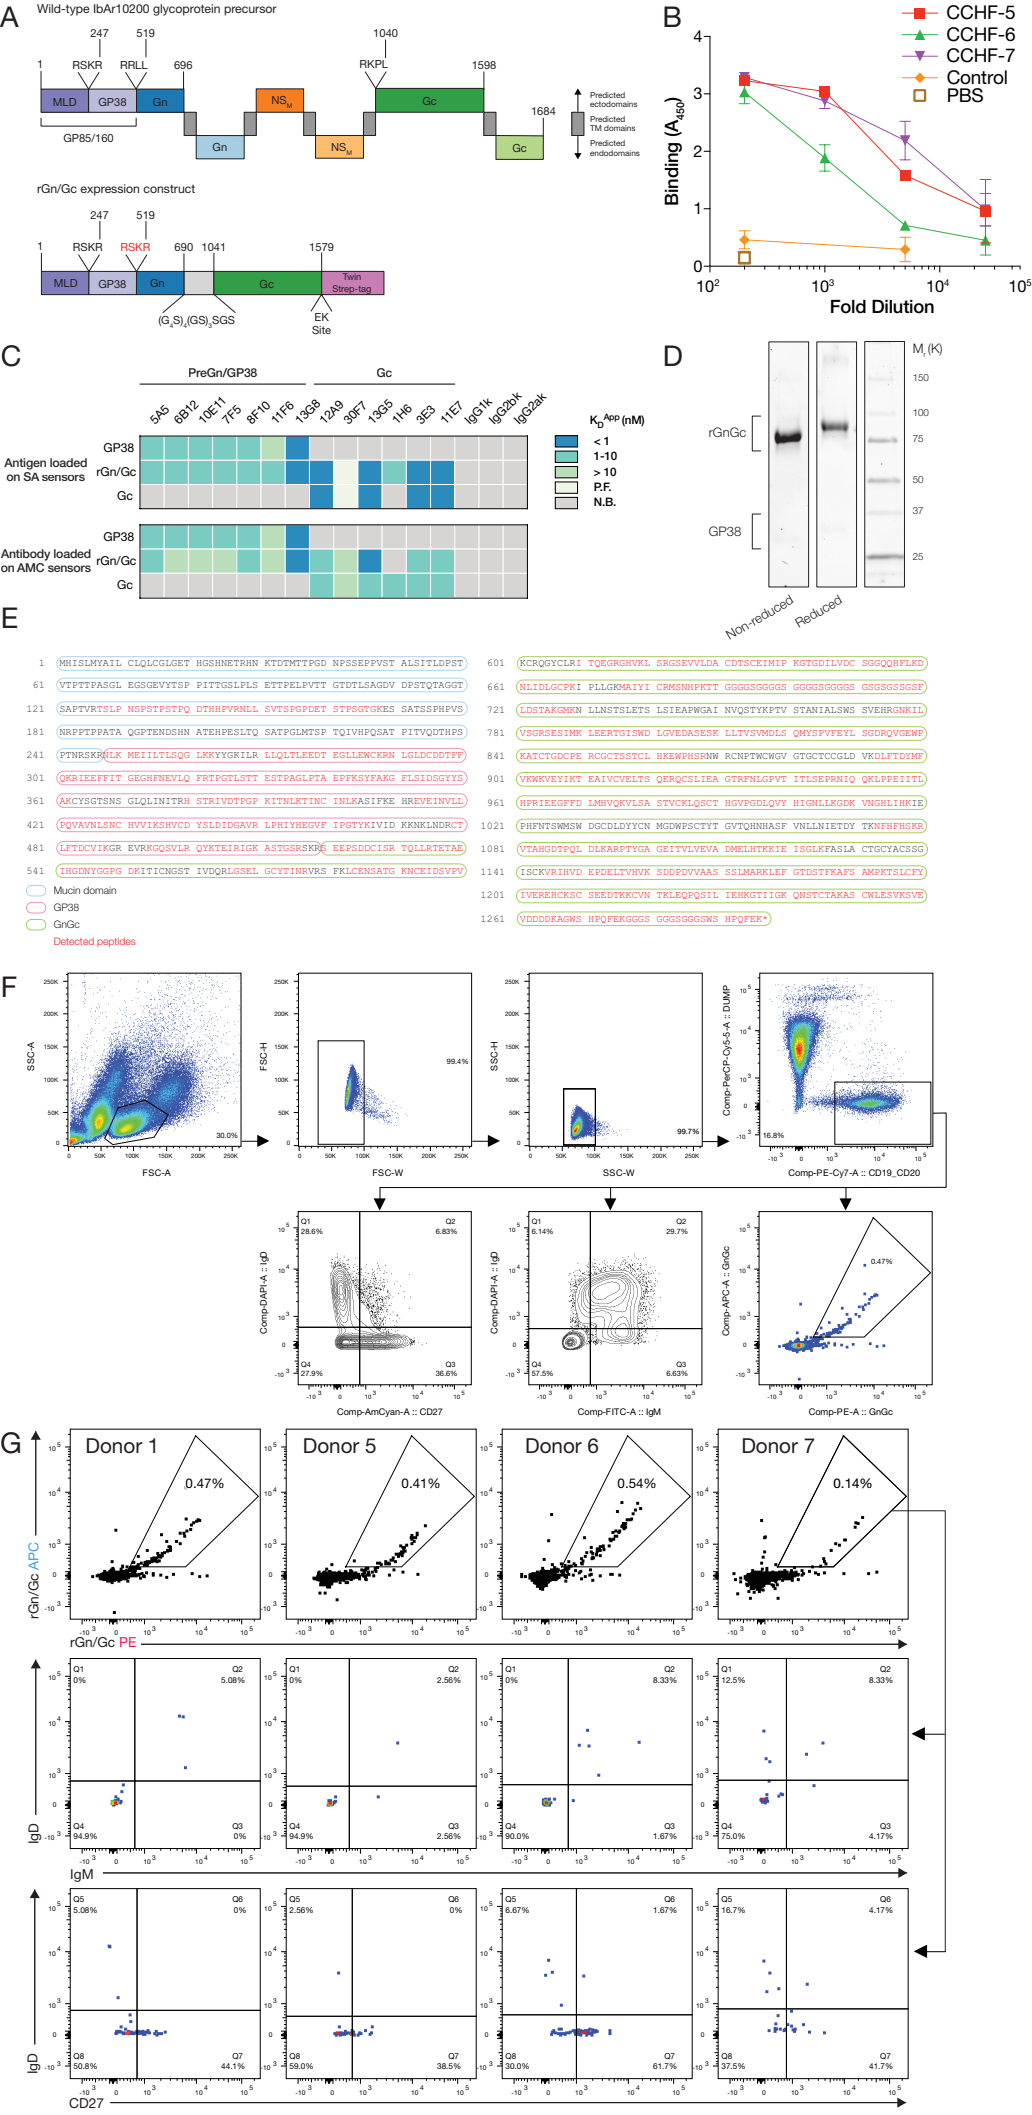

Supplement: NIHMS1702235-supplement-1.pdf [file NIHMS1702235-supplement-1.pdf]

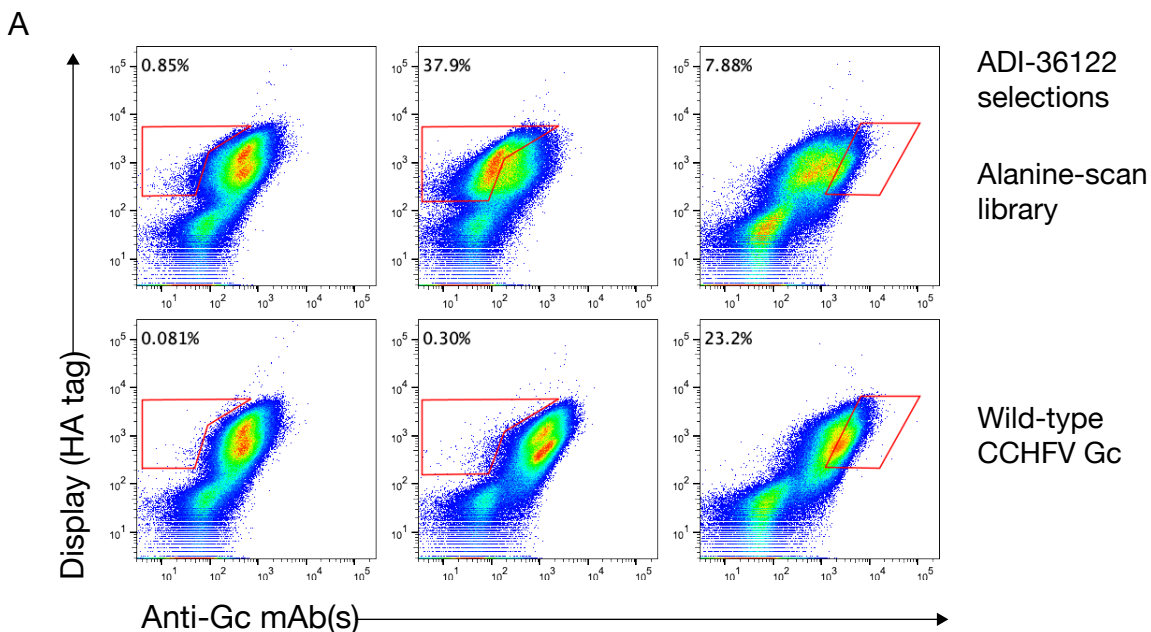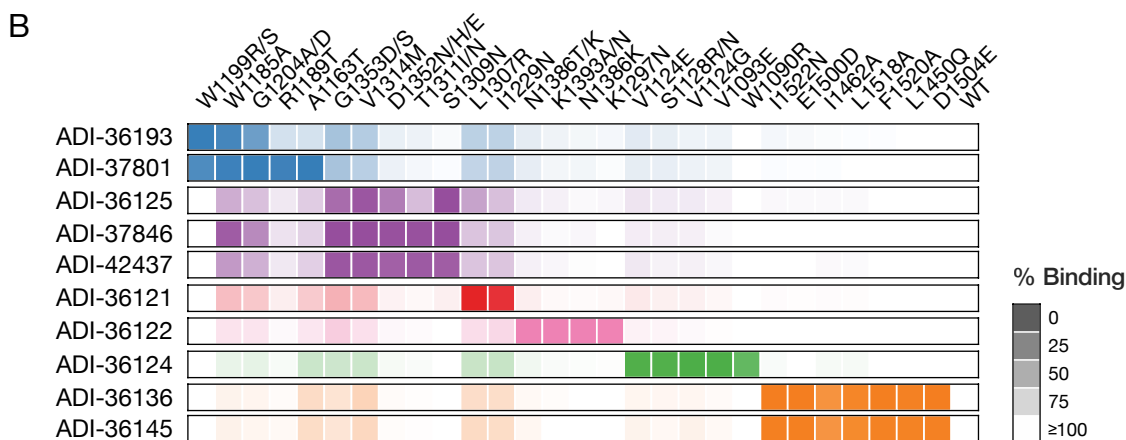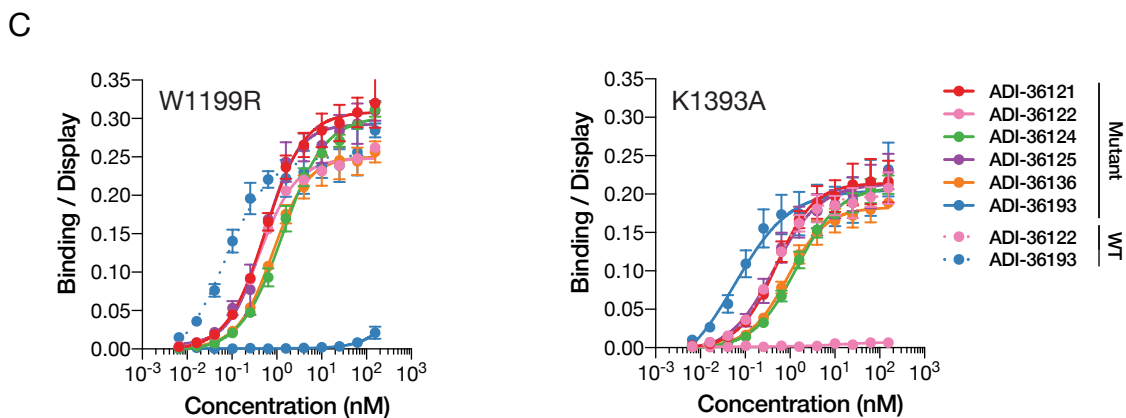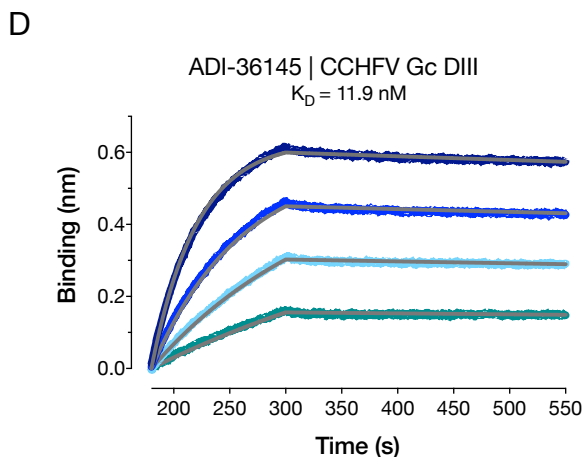

Supplement: NIHMS1702235-supplement-4.pdf [file NIHMS1702235-supplement-4.pdf]

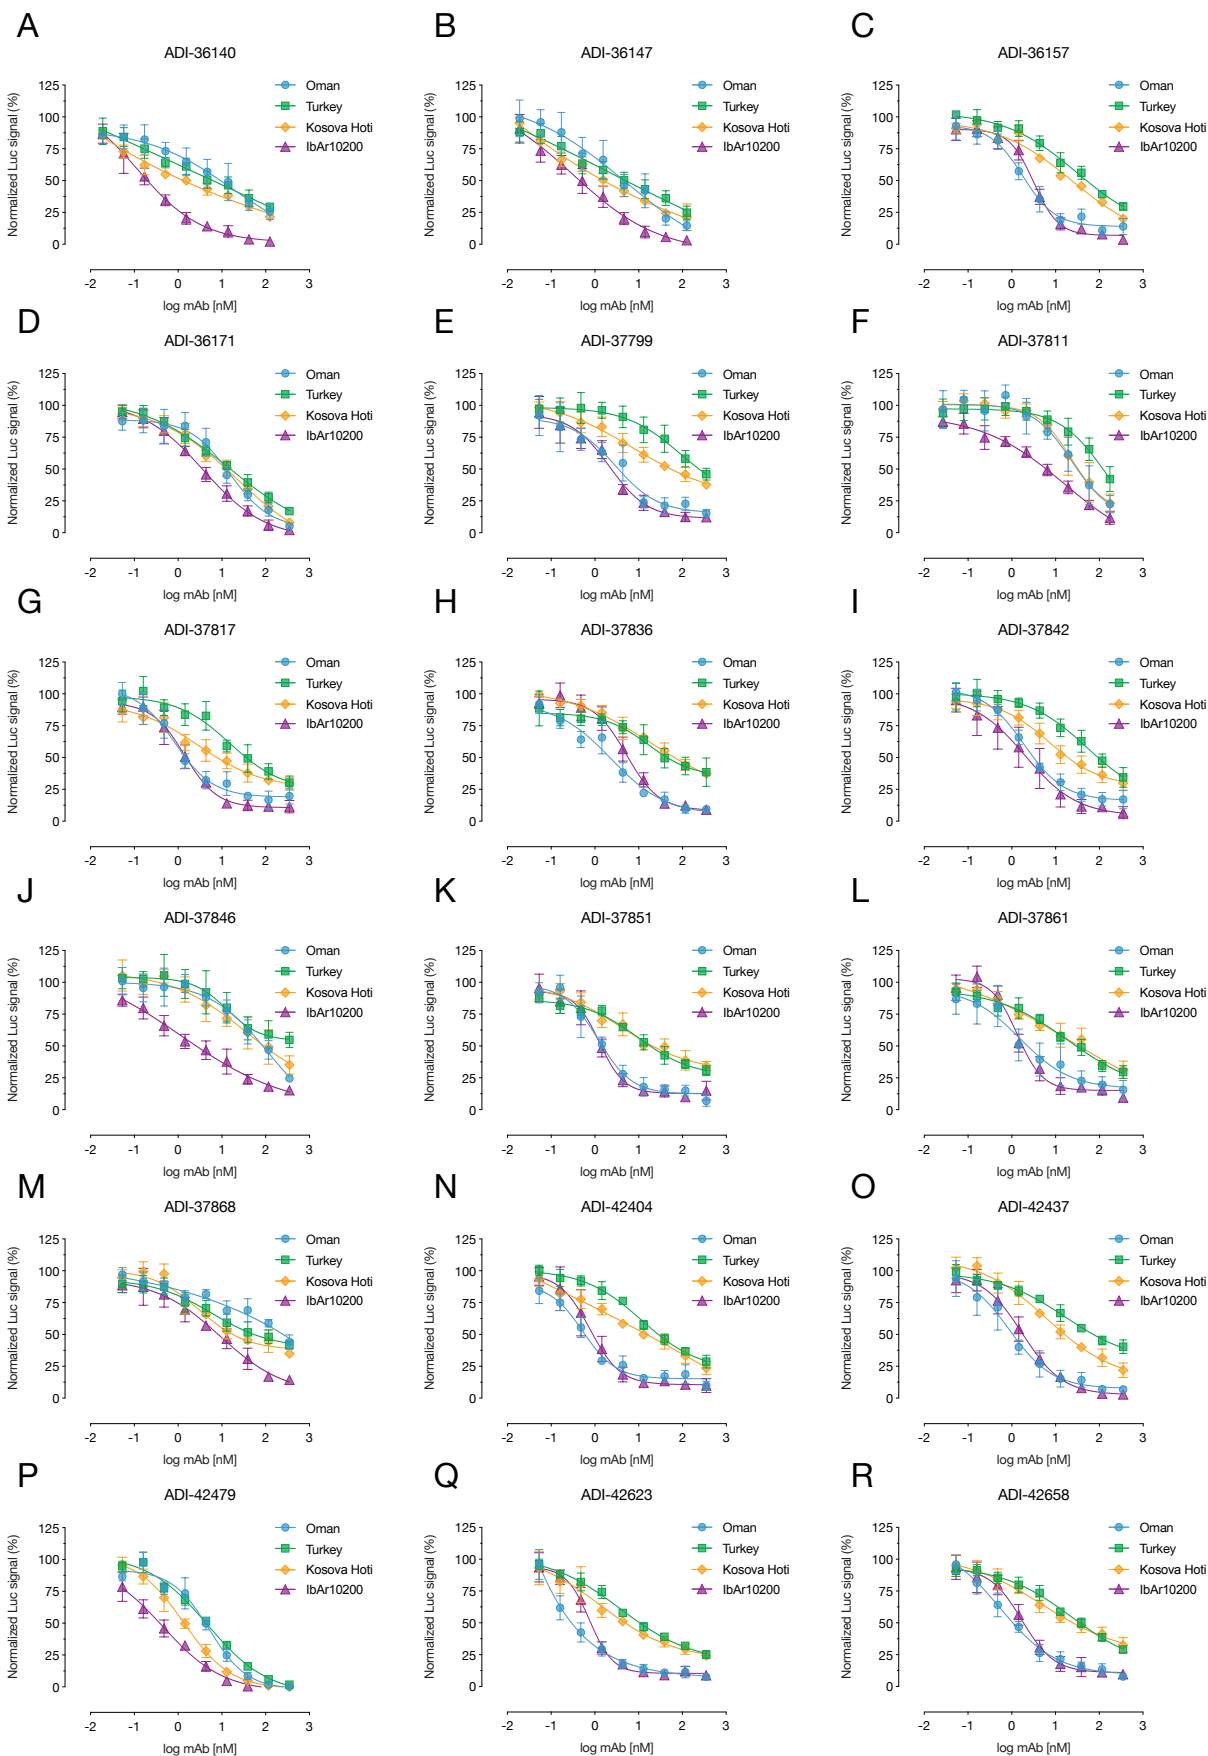

Supplement: NIHMS1702235-supplement-5.pdf [file NIHMS1702235-supplement-5.pdf]

**A** ADI-36121+37817  
Oman tecVLP

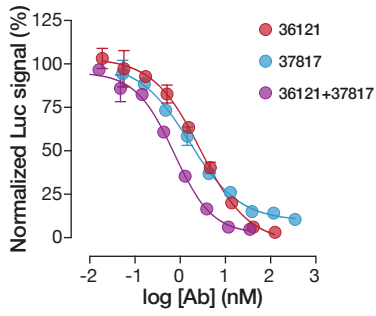

**B** ADI-36121+37836  
Oman tecVLP

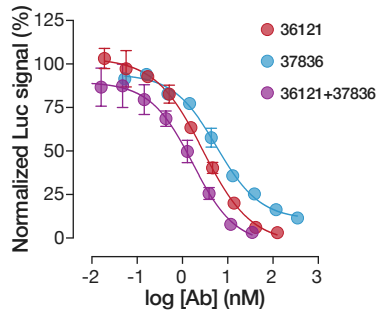

**C** ADI-36121+37842  
Oman tecVLP

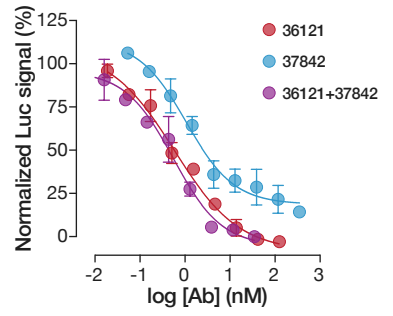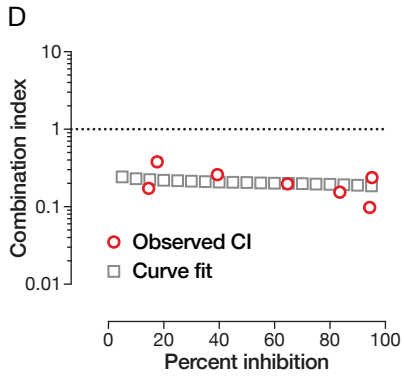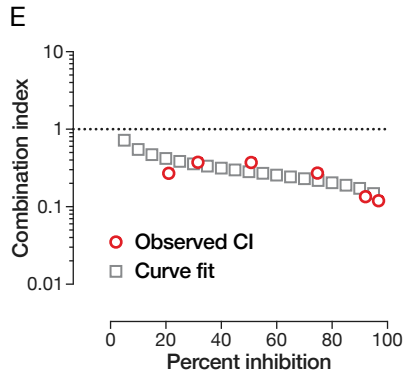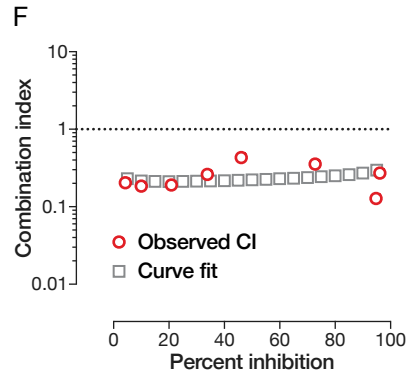

Supplement: NIHMS1702235-supplement-6.pdf [file NIHMS1702235-supplement-6.pdf]

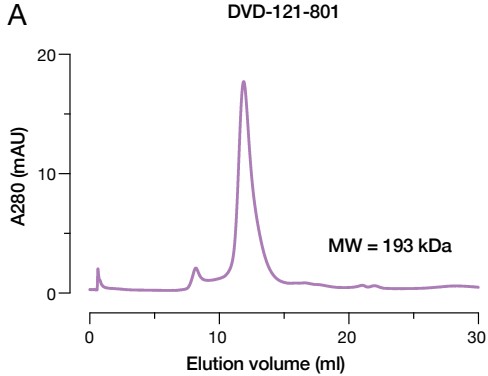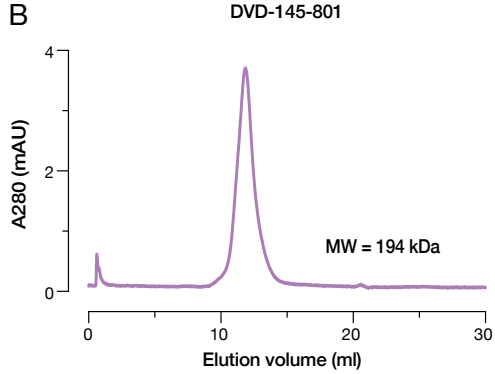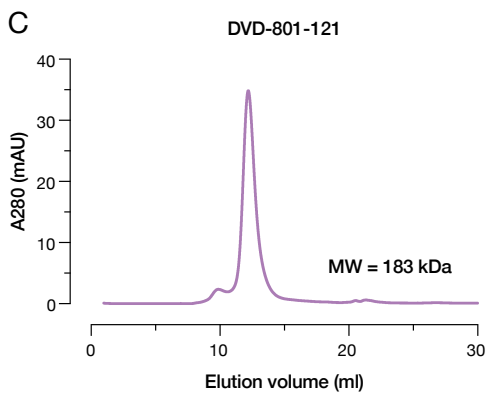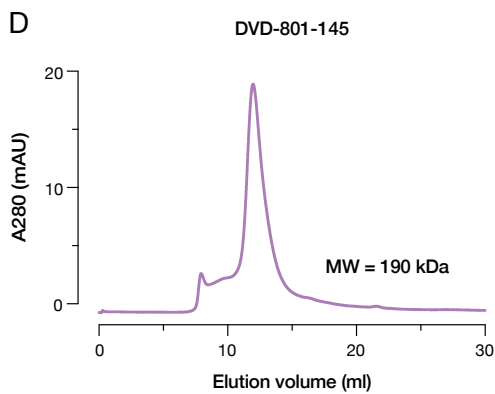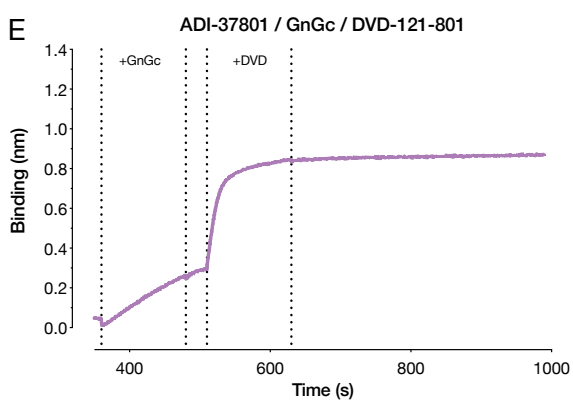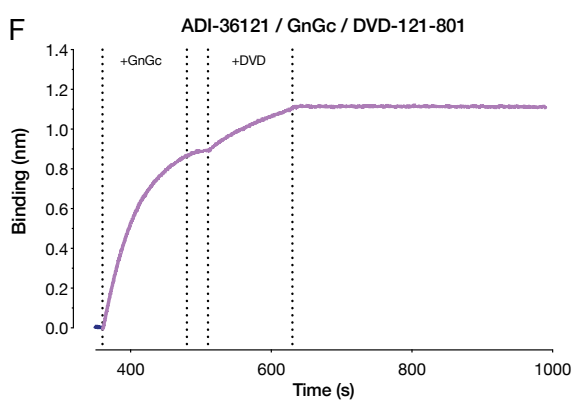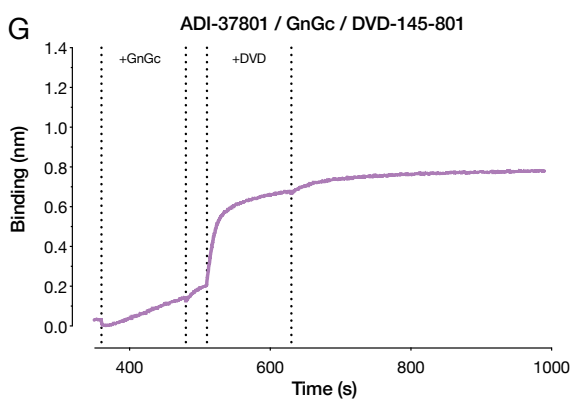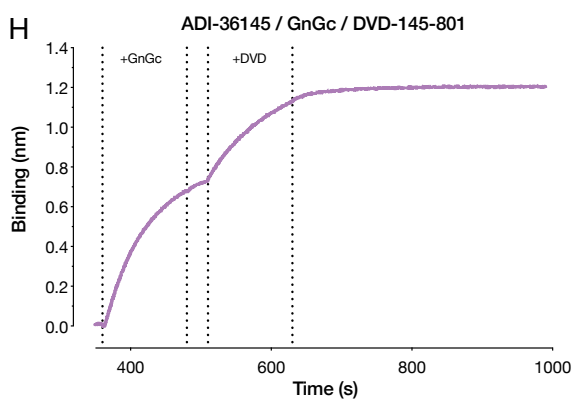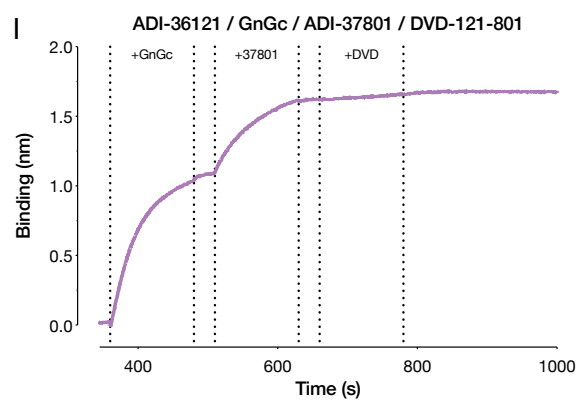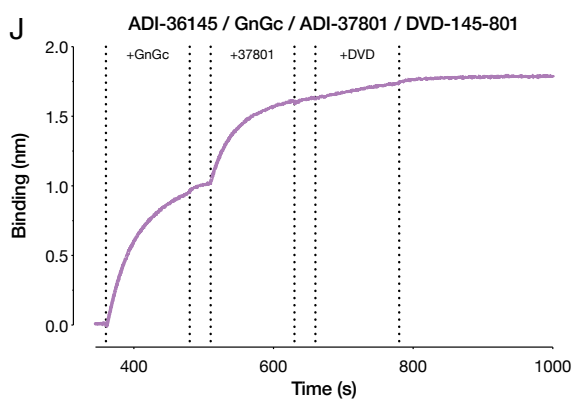

Supplement: NIHMS1702235-supplement-7.pdf [file NIHMS1702235-supplement-7.pdf]
